# Supplementary material for: Dynamic regulatory networks of T cell trajectory dissect transcriptional control of T cell state transition
Source: PubMed Central journal article supplement — Mol Ther Nucleic Acids. 2021 Oct 19;26:1115–29. doi: 10.1016/j.omtn.2021.10.011 (PMC8577129; doi:10.1016/j.omtn.2021.10.011), 2021-10-19
Supplement: mmc1.pdf [file mmc1.pdf]

OMTN, Volume 26

## **Supplemental information**

### **Dynamic regulatory networks of T cell trajectory dissect transcriptional control of T cell state transition**

**Min Yan, Jing Hu, Huating Yuan, Liwen Xu, Gaoming Liao, Zedong Jiang, Jiali Zhu, Bo Pang, Yanyan Ping, Yunpeng Zhang, Yun Xiao, and Xia Li**

**Table S1: datasets used for constructing dynamic networks.**

| dataset   | Cancer type | #CD8+ cells | T | platform   | publication                           |
|-----------|-------------|-------------|---|------------|---------------------------------------|
| GSE127471 | NSCLC       | 300         |   | 10X        | Newman AM, et al. Nat Biotechnol 2019 |
| GSE120575 | SKCM        | 6695        |   | Smart-seq2 | Sade-Feldman M, et al. Cell 2018      |
| GSE140228 | LIHC        | 16532       |   | 10X        | Zhang Q, et al. Cell 2019             |
| GSE118056 | MCC         | 756         |   | 10X        | Paulson KG, et al. Nat Commun 2018    |
| EMTAB6149 | NSCLC       | 12040       |   | 10X        | Lambrechts D, et al. Nat Med 2018     |
| GSE103322 | HNSCC       | 434         |   | Smart-seq2 | Puram SV, et al. Cell 2018            |
| GSE123813 | SCC         | 15560       |   | 10X        | Yost KE, et al. Nat Med 2019          |
| GSE110686 | BRCA        | 1525        |   | 10X        | Savas P, et al. Nat Med 2018          |

**Table S2. Curated TFs related to T cell dysfunction.**

**Table S3. TFs with significantly different regulatory activities in each window.**

| window | direction | Number | TFs                                                                                                                                                                                                                                                                                                                                                   |
|--------|-----------|--------|-------------------------------------------------------------------------------------------------------------------------------------------------------------------------------------------------------------------------------------------------------------------------------------------------------------------------------------------------------|
| W1     | down      | 23     | ARID4B,ATF6B,ATRX,BACH2,BCL11B,ETS1,FOXP1,HIV<br>VEP2,IKZF1,IRF9,KLF2,KLF3,LEF1,MYC,SATB1,TCF7,<br>TRERF1,ZGPAT,ZNF292,ZNF48,ZNF652,ZNF83,ZNF91                                                                                                                                                                                                       |
| W1     | up        | 24     | BATF,CREM,DNAJC1,EOMES,FOS,FOSB,HOPX,ID2,IK<br>ZF3,IRF1,IRF7,JUNB,KLF6,LYAR,MYBL1,NFATC2,NFK<br>BIA,PHTF2,PRDM1,RBPJ,RUNX3,SP140,ZBTB38,ZNF6<br>83                                                                                                                                                                                                    |
| W2     | down      | 19     | HOPX,ID2,KLF2,LEF1,LRRFIP1,LYAR,MXD3,MYBL1,<br>MYC,NFKBIA,PRDM1,RUNX2,SATB1,STAT1,TCF7,TR<br>ERF1,TSC22D3,ZGPAT,ZNF683                                                                                                                                                                                                                                |
| W2     | up        | 13     | CREM,EOMES,FOS,IKZF3,KDM2A,NCOR1,NFATC2,RB<br>PJ,TOX,TRPS1,ZBTB38,ZEB2,ZNF48                                                                                                                                                                                                                                                                          |
| W3     | down      | 4      | EOMES,FOS,TCF7,TSC22D3                                                                                                                                                                                                                                                                                                                                |
| W3     | up        | 52     | ARID4B,ATRX,BATF,BCL11B,BHLHE40,CREB3L2,CRE<br>M,DNAJC1,ETS1,FOXP1,HIF1A,HIVP3,HMGA1,HOPX<br>,ID2,IKZF1,IKZF3,IRF1,IRF7,IRF9,KAT7,KDM5B,KLF13<br>,KLF6,KMT2A,LRRFIP1,LYAR,MXD3,NCOR1,NFATC2,<br>NFKBIA,NR3C1,PHTF2,PRDM1,RBPJ,RUNX2,RUNX3,S<br>P100,SP140,STAT1,STAT3,STAT4,TRERF1,ZBTB20,ZBT<br>B38,ZEB2,ZGPAT,ZNF276,ZNF292,ZNF48,ZNF652,ZNF6<br>83 |
| W4     | down      | 27     | ATRX,BCL11B,EOMES,ETS1,FOSB,FOXP1,HOPX,IKZF<br>1,IRF1,JUNB,KLF12,KLF6,KMT2A,LRRFIP1,LYAR,NCO<br>R1,NFATC2,NFKBIA,RUNX3,SP100,STAT4,TRERF1,TS<br>C22D3,ZBTB38,ZGPAT,ZNF276,ZNF91                                                                                                                                                                       |
| W4     | up        | 25     | ARID4B,BATF,BHLHE40,CREB3L2,CREM,DNAJC1,ET<br>V1,HIF1A,ID2,IKZF3,IRF7,IRF9,MAF,MSC,MXD3,NR3C<br>1,PHTF2,RBPJ,RUNX2,SP140,STAT1,STAT3,TOX,ZNF29<br>2,ZNF48                                                                                                                                                                                             |

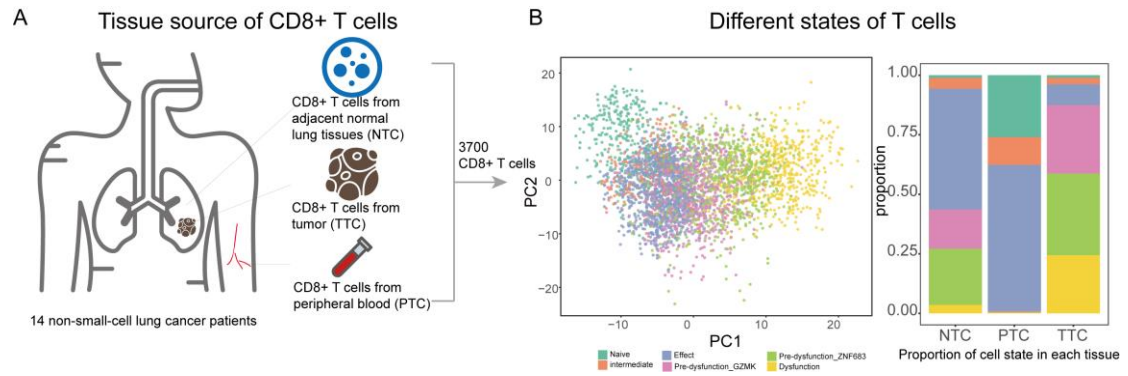

**Figure S1. Data collection and statistic information of the NSCLC scRNA-seq.**

(A) The detailed information of the NSCLC dataset, including number of patients, tissue sampling. (B) (Left panel) PCA plot for T cells, which colored by their state. (Right panel) The state composition of cells with different origin.

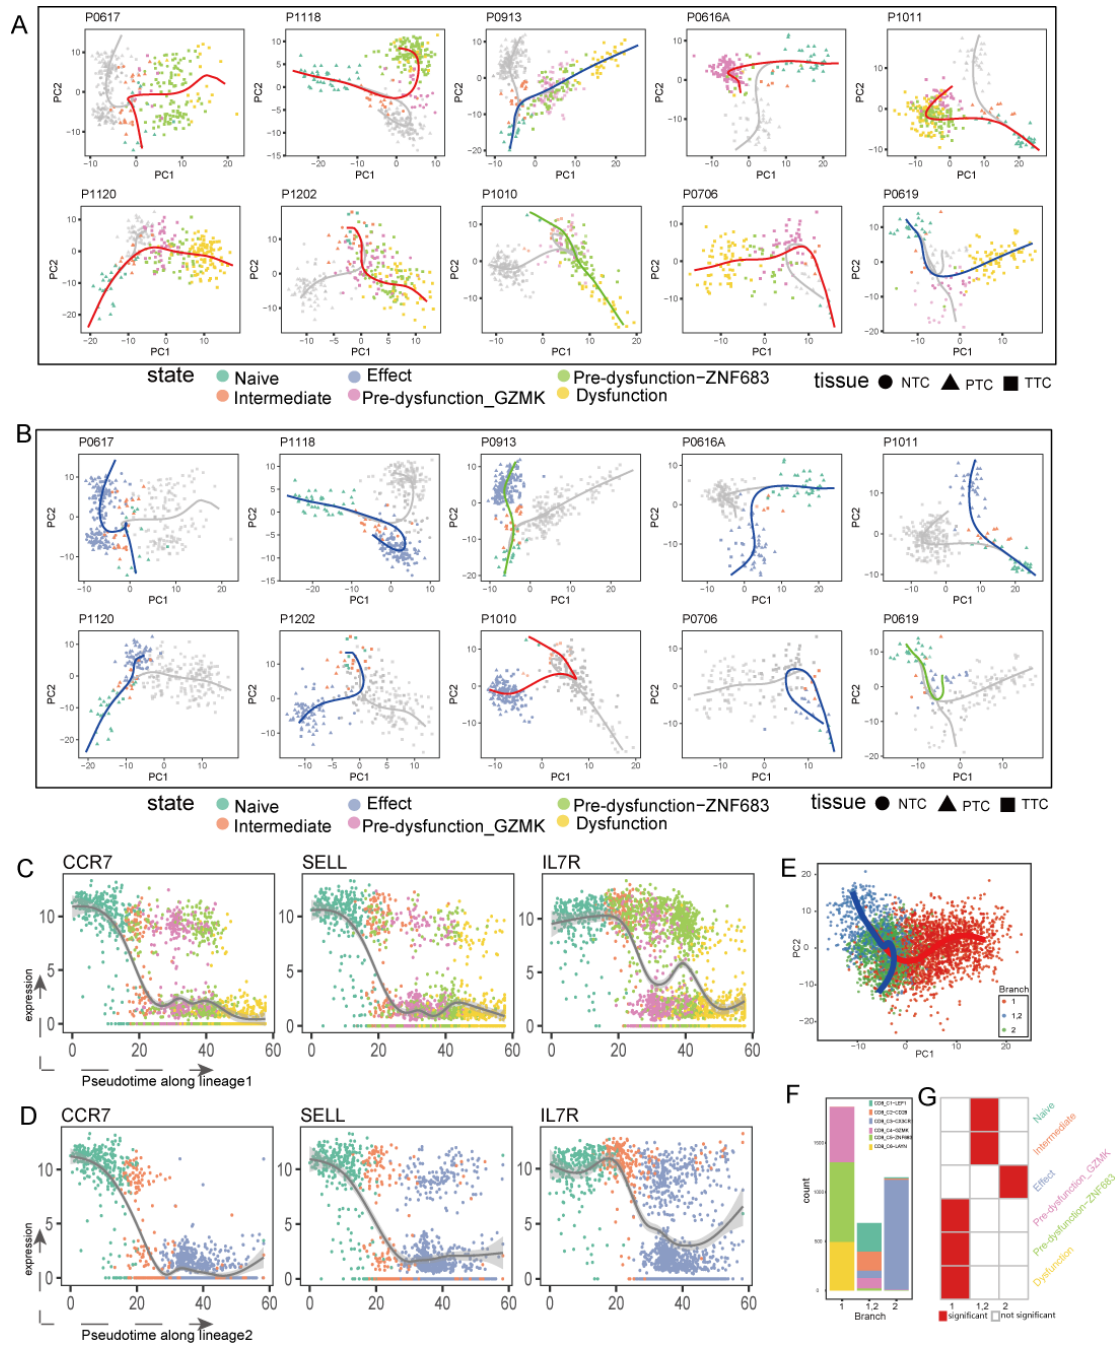

**Figure S2. Expression distribution of naive markers along pseudo-time.**

(A-B) Pseudo-time analysis of CD8<sup>+</sup> T cells for individual patients. The colored lineage was dysfunction lineage (A) and effect lineage (B). Point shape represented by tissues origin. (C-D) Expression distribution of naive markers along pseudo-time on the dysfunction lineage (C) or on the effect lineage (D). (E) T cell trajectory for all cells, colored by branch. (F) Cell state composition on the three branches. (G) Enrichment of cell states in each branch. Boxes filled with red denoted significant results with hypergeometric test  $p$ -value  $< 0.05$ .

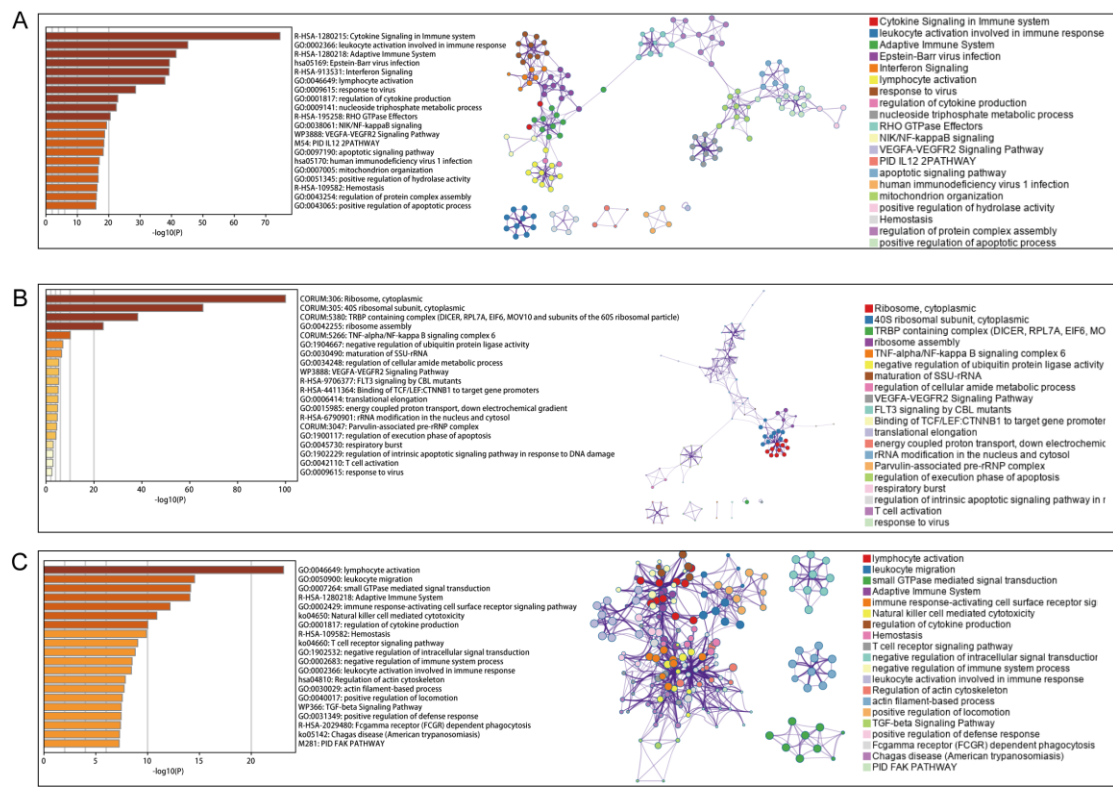

**Figure S3. Enriched functional terms for the three dynamic gene clusters. (A-C)** Visualization of enrichment results by Metascape for cluster 1, cluster 2 and cluster 3, respectively.

The pipeline of dynamic network construction

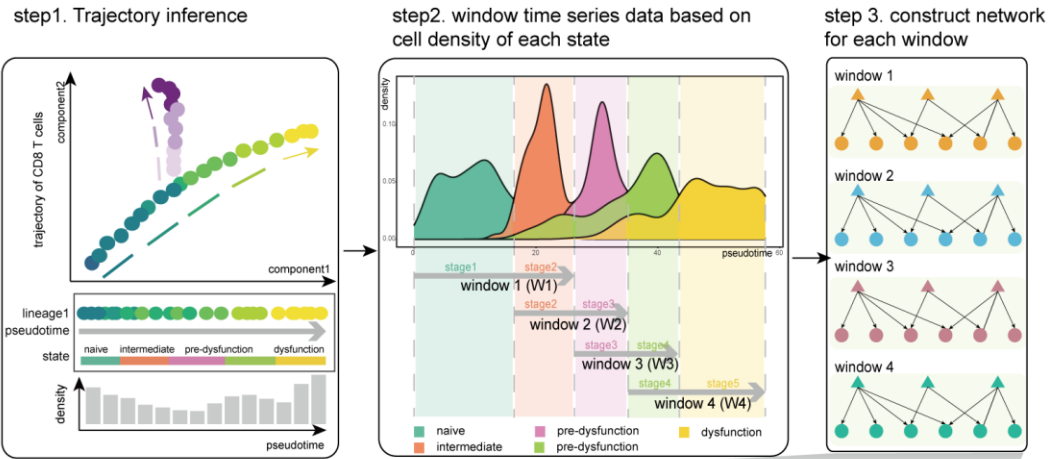

Network construction flowchart

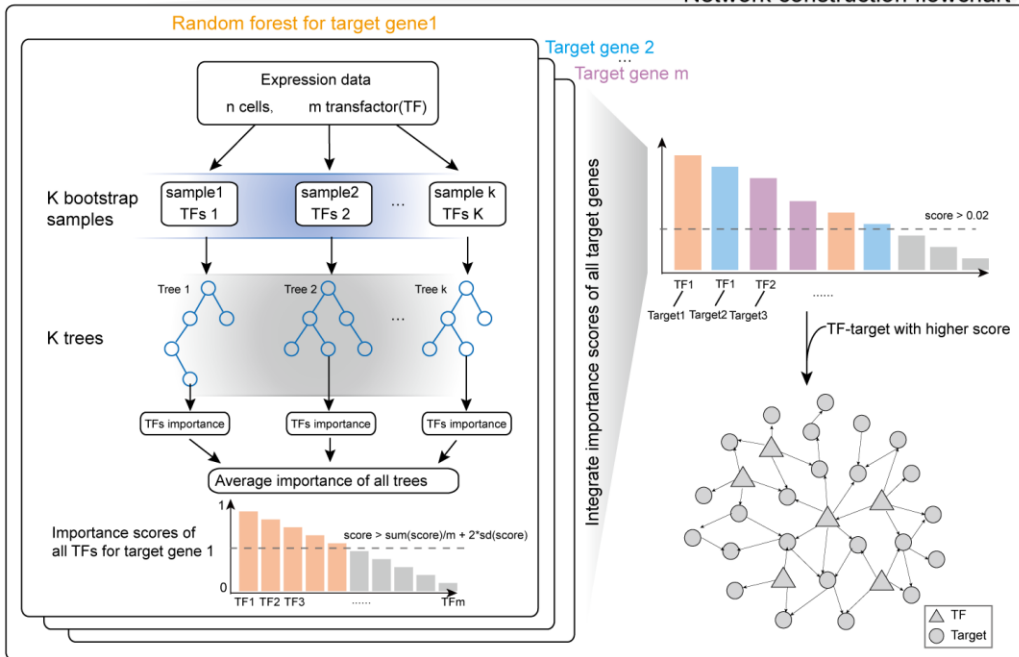

Figure S4. The pipeline of dynamic network construction.

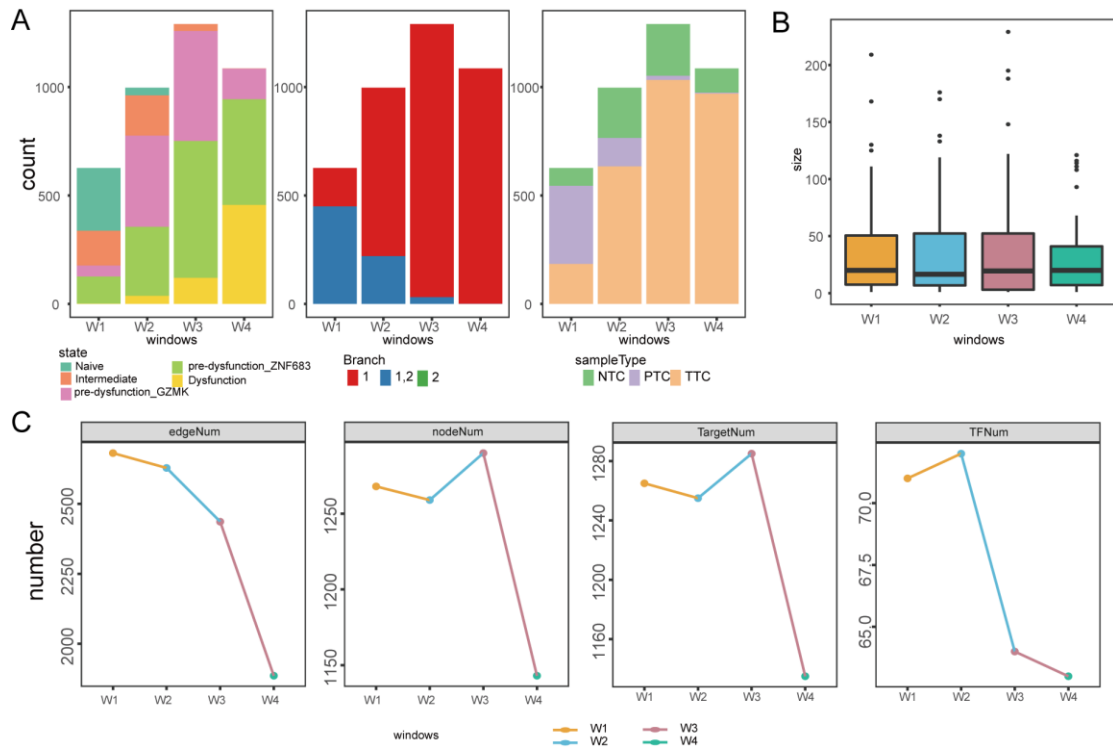

**Figure S5. The basic statistics of dynamic networks.**

(A) The distribution of cells in the aspect of states, branches and tissue sources in each window. (B) Distributions of regulon size in each network. (C) The number of edges, nodes, targets and TFs in networks of four windows.



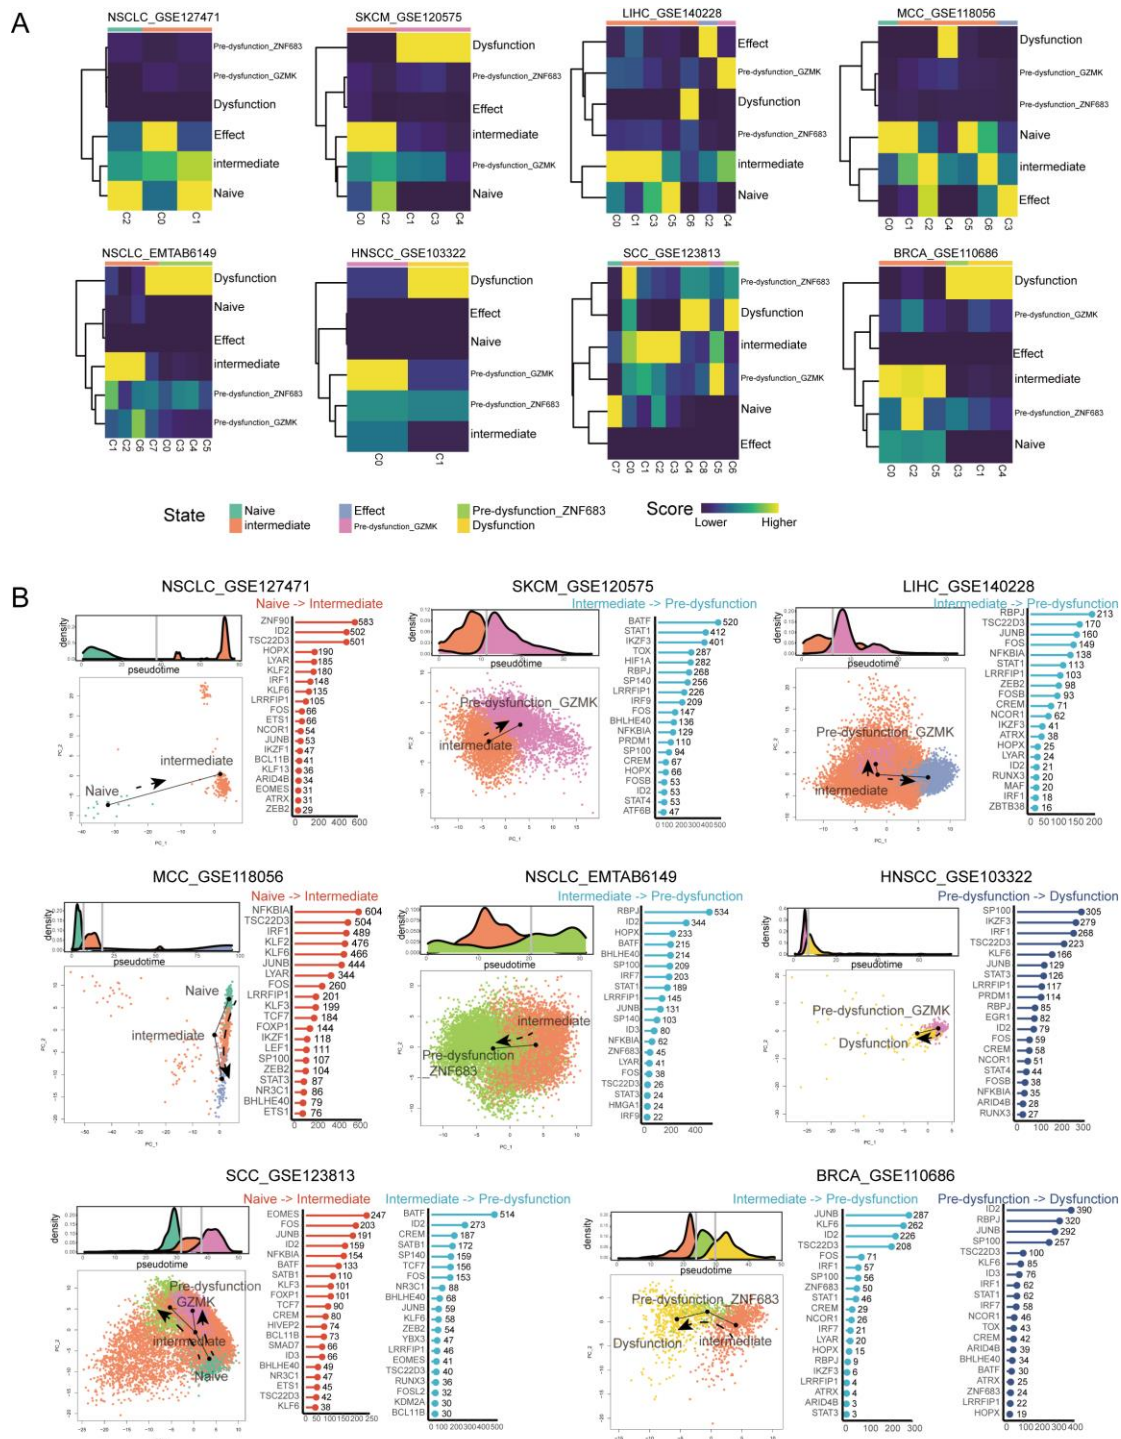

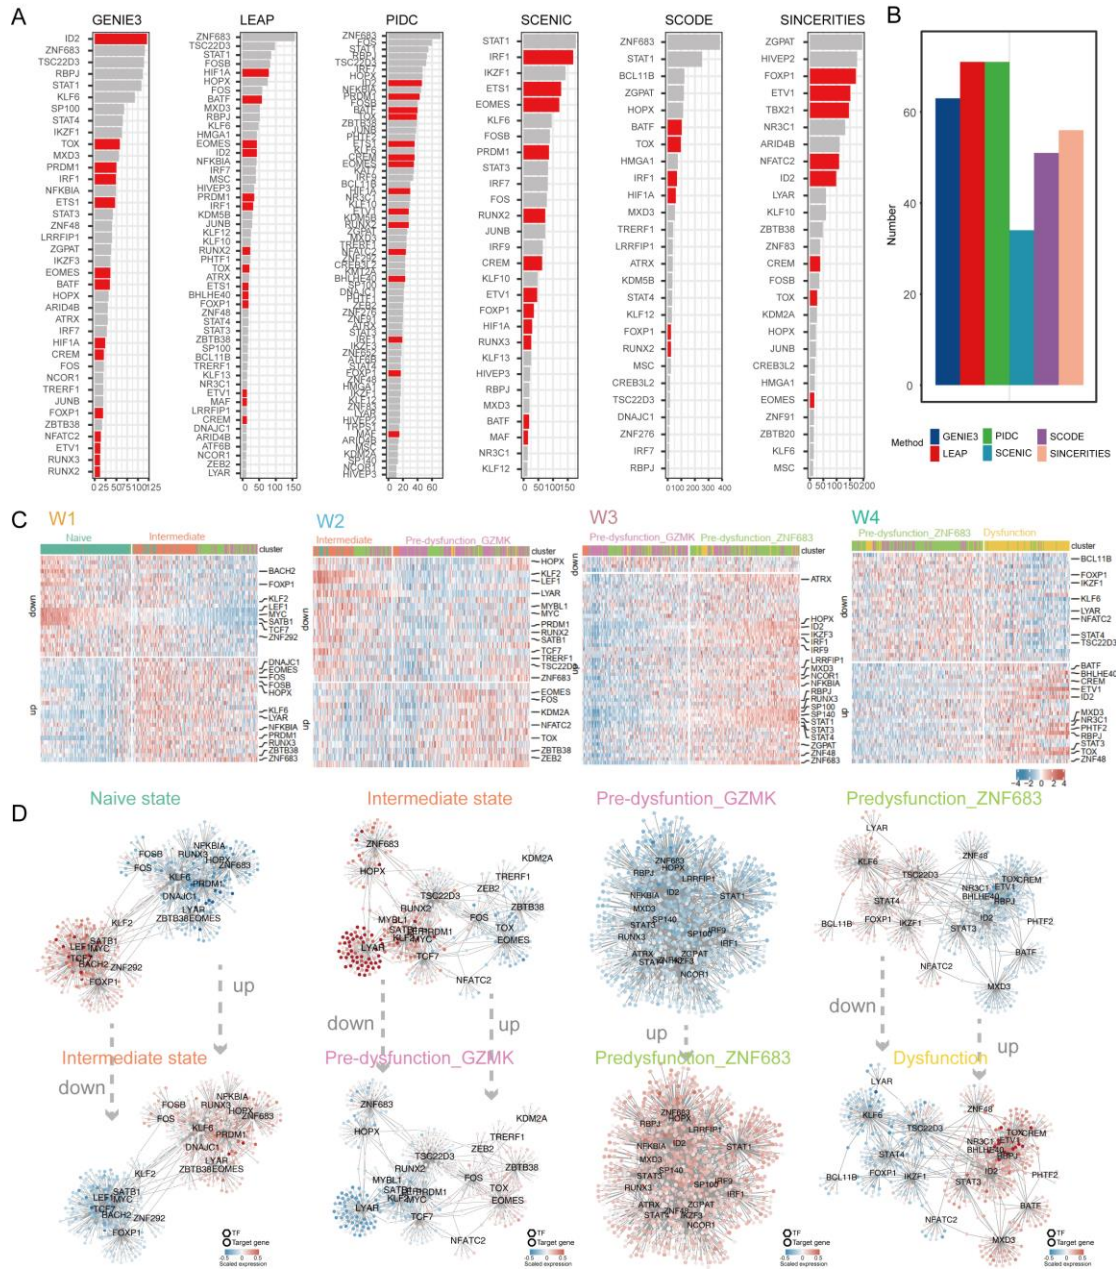

**Figure S7. The activities of TFs dynamic changes across different states.**  
 (A) Regulators identified by different method in window W4. The regulators ordered by the number of target genes. The curate TFs related to T cell dysfunction were labeled. (B) The number of regulators identified by different method in window W4. (C) The activities of significantly different TF regulons (Wilcoxon Rank-Sum test, FDR < 0.05) in cells of each window. The top 20 significant TFs were labeled. (D) Expression changes of genes in the sub-network of the top 20 TFs between the corresponding two states in each window. Nodes are colored by the average expression in the corresponding states.

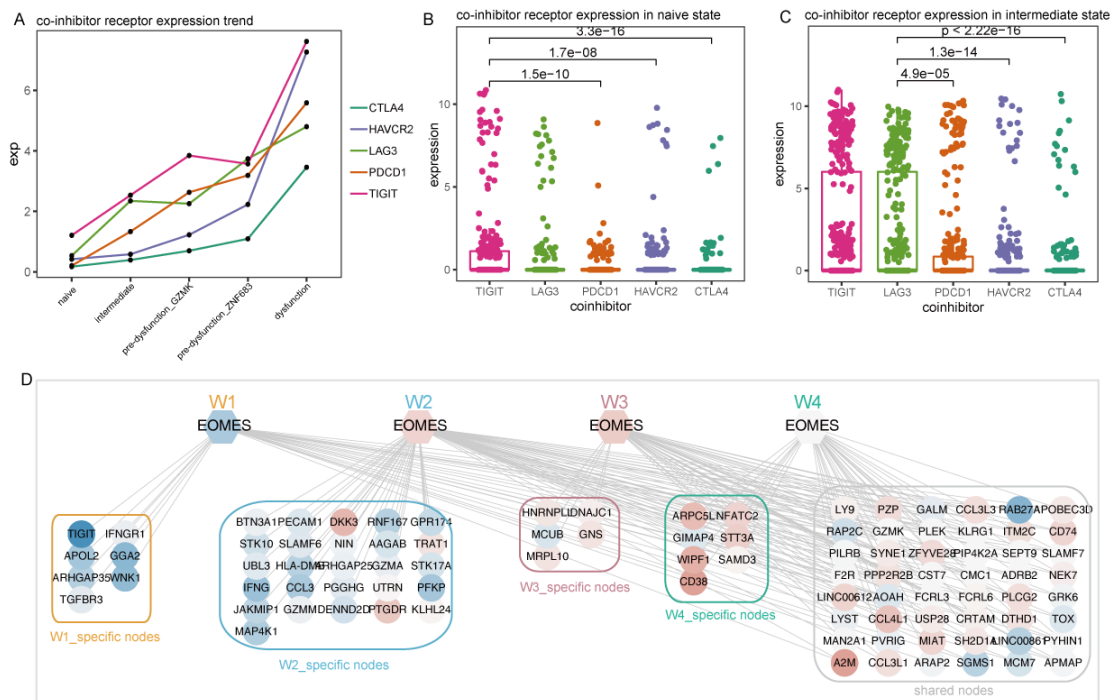

**Figure S8. Dynamics of expression for co-inhibitory receptors, and regulatory rewiring of transcription factor EOMES.** (A) The average expression of each co-inhibitory receptor in cells from different states. (B-C) The expression of co-inhibitory receptors in naive cells (B) or in intermediate cells (C) within the window W1. (D) The first four groups of target genes represent window-specific targets in W1, W2, W3 and W4, respectively, and the last group of genes contained targets which were shared by at least two windows.



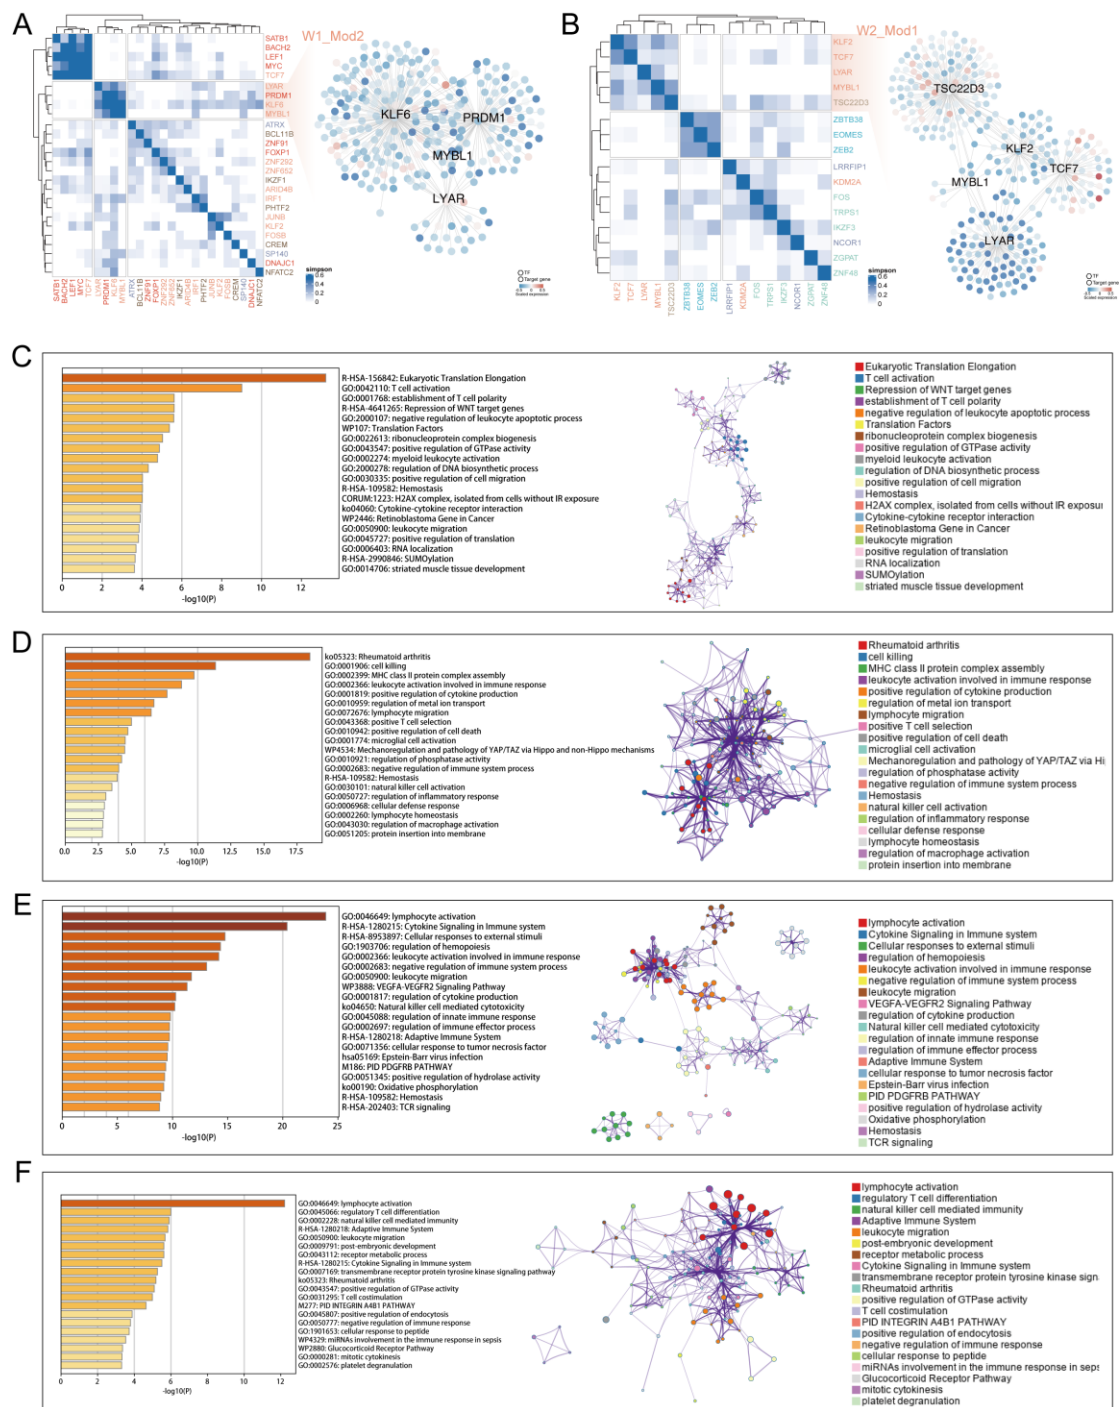

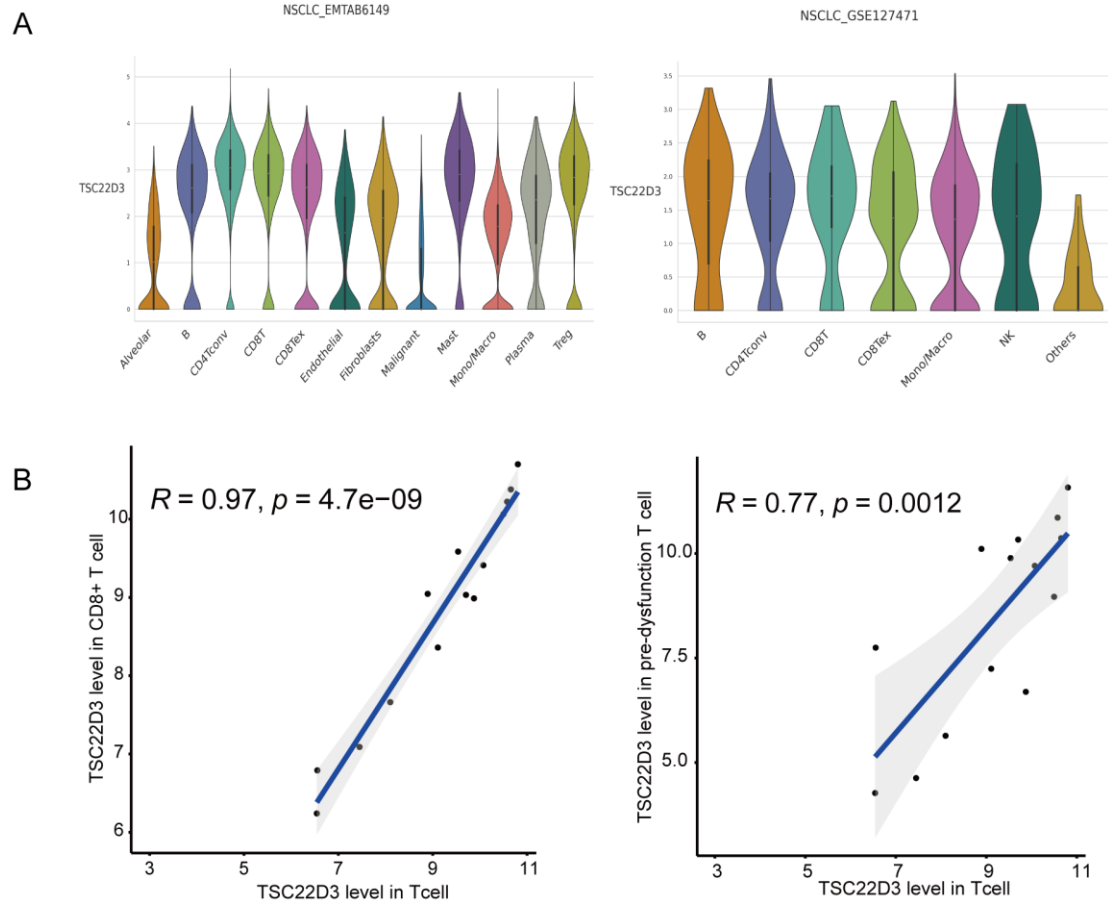

**Figure S10. Expression of TSC22D3 in various cell types.**

(A) Expression of TSC22D3 across various cell types in dataset EMTAB6149 and GSE127471. (B) In the core dataset GSE99254, correlation between TSC22D3 expression level in the T cells and TSC22D3 expression level in the pre-dysfunction T cells or CD8+ T cells.
